# Supplementary material for: Bioprocessed Brewers’ Spent Grain Improves Nutritional and Antioxidant Properties of Pasta
Source: MDPI journal article supplement (doi:10.3390/antiox10050742), 2021-05-07
Supplement: s1 [file s1]

**Supplementary Table 1.** Drying cycle used for pasta making.

| CYCLE | VENTILATION         |       |            | RECOVERY            |       |            |
|-------|---------------------|-------|------------|---------------------|-------|------------|
|       | Temperature<br>(°C) | U.R.% | Time (min) | Temperature<br>(°C) | U.R.% | Time (min) |
| 1     | 55                  | 85    | 3          | 55                  | 85    | 2          |
| 2     | 55                  | 85    | 3          | 55                  | 85    | 2          |
| 3     | 55                  | 70    | 3          | 55                  | 70    | 4          |
| 4     | 55                  | 70    | 3          | 40                  | 65    | 8          |
| 5     | 55                  | 70    | 3          | 40                  | 60    | 10         |
| 6     | 55                  | 70    | 3          | 40                  | 60    | 10         |
| 7     | 55                  | 70    | 3          | 40                  | 55    | 10         |
| 8     | 55                  | 70    | 3          | 40                  | 55    | 12         |
| 9     | 55                  | 70    | 3          | 40                  | 55    | 12         |
| 10    | 55                  | 70    | 3          | 40                  | 55    | 12         |
| 11    | 55                  | 70    | 3          | 40                  | 55    | 12         |
| 12    | 55                  | 70    | 3          | 40                  | 55    | 14         |
| 13    | 55                  | 70    | 3          | 40                  | 50    | 14         |
| 14    | 55                  | 70    | 3          | 40                  | 50    | 16         |
| 15    | 55                  | 70    | 3          | 40                  | 50    | 16         |
| 16    | 55                  | 70    | 3          | 40                  | 50    | 16         |
| 17    | 55                  | 65    | 3          | 40                  | 50    | 16         |
| 18    | 55                  | 65    | 3          | 40                  | 50    | 18         |
| 19    | 55                  | 65    | 3          | 40                  | 50    | 18         |
| 20    | 55                  | 65    | 3          | 40                  | 45    | 18         |
| 21    | 55                  | 65    | 3          | 40                  | 45    | 18         |
| 22    | 55                  | 60    | 3          | 35                  | 45    | 18         |
| 23    | 55                  | 60    | 3          | 35                  | 45    | 18         |
| 24    | 50                  | 55    | 3          | 35                  | 45    | 18         |
| 25    | 45                  | 55    | 3          | 35                  | 15    | 18         |
| 26    | 40                  | 40    | 3          | 15                  | 15    | 10         |
| 27    | 15                  | 10    | 20         | 15                  | 10    | 20         |
| 28    | 15                  | 10    | 20         | 15                  | 10    | 20         |

**Supplementary Table 2.** List of the attributes and reference standards used for the sensory analysis of pasta.

| Selected Attributes                 | Reference Standards        |
|-------------------------------------|----------------------------|
| <i>Appearance</i>                   |                            |
| Evenness of colour                  | Whole grain Pasta          |
| Homogeneity of texture (by looking) |                            |
| <i>Odor</i>                         |                            |
| Cereal                              | Brewers’ spent grain       |
| Maltiness                           | Malt Extract (0.5%)        |
| Sourdough Bread-like                | Rye Bread                  |
| Overall intensity                   |                            |
| <i>Texture</i>                      |                            |
| Roughness                           | Extruded corn              |
| Chewiness                           | Whole grain pasta          |
| <i>Taste/Flavor</i>                 |                            |
| Whole grain                         | Whole grain bread          |
| Bitterness                          | Caffeine solution (0.035%) |
| Overall Intensity                   |                            |
